# Supplementary material for: Construction of Cu(ii), Zn(ii) and Cd(ii) metal–organic frameworks of bis(1,2,4-triazol-4-yl)ethane and benzenetricarboxylate: syntheses, structures and photocatalytic properties
Source: Royal Society of Chemistry journal article supplement (doi:10.1039/c4ce02465f), 2015-01-01
Supplement: c4ce02465f1.pdf [file c4ce02465f1.pdf]

## Supporting Materials

### Syntheses, structures and photocatalytic properties of three coordination polymers based on 1,2-bis(1,2,4-triazol-4-yl)ethane and benzenetricarboxylate

Yan-Fen Peng<sup>a,b</sup>, Shan Zhao<sup>a</sup>, Ke Li<sup>a</sup>, Lu Liu<sup>a</sup>, Bao-Long Li<sup>\*,a</sup>, Bing Wu<sup>a</sup>

<sup>a</sup>Key Laboratory of Organic Synthesis of Jiangsu Province, College of Chemistry, Chemical Engineering and Materials Science, Soochow University, Suzhou 215123, P.R. China. E-mail: libaolong@suda.edu.cn

<sup>b</sup>Department of Material and Chemical Engineering, Chizhou University, Chizhou, Anhui, 247000, P.R. China.

**Table S1** Selected bond lengths and angles for **1**, **2** and **3** (Å and °).

| <hr/>               |           |                     |            |
|---------------------|-----------|---------------------|------------|
| <b>1</b>            |           |                     |            |
| Cu(1)-O(1)          | 1.970(5)  | Cu(1)-O(5)#2        | 1.954(5)   |
| Cu(1)-O(7)          | 2.402(5)  | Cu(1)-O(7)#1        | 1.943(5)   |
| Cu(1)-N(1)          | 1.951(6)  | Cu(2)-O(2)          | 2.088(5)   |
| Cu(2)-O(4)#3        | 2.222(5)  | Cu(2)-O(7)          | 1.922(5)   |
| Cu(2)-O(8)          | 1.944(5)  | Cu(2)-N(2)#1        | 2.098(6)   |
| O(5)#2-Cu(1)-O(1)   | 94.9(2)   | O(1)-Cu(1)-O(7)     | 103.40(19) |
| O(7)#1-Cu(1)-O(1)   | 171.2(2)  | N(1)-Cu(1)-O(1)     | 88.0(2)    |
| O(5)#2-Cu(1)-O(7)   | 78.69(19) | O(7)#1-Cu(1)-O(5)#2 | 89.3(2)    |
| N(1)-Cu(1)-O(5)#2   | 173.8(2)  | N(1)-Cu(1)-O(7)     | 106.0(2)   |
| O(7)#1-Cu(1)-O(7)   | 84.94(19) | O(7)#1-Cu(1)-N(1)   | 87.1(2)    |
| O(2)-Cu(2)-O(4)#3   | 91.5(2)   | O(7)-Cu(2)-O(2)     | 92.2(2)    |
| O(8)-Cu(2)-O(2)     | 84.4(2)   | O(2)-Cu(2)-N(2)#1   | 168.6(2)   |
| O(7)-Cu(2)-O(4)#3   | 99.9(2)   | O(8)-Cu(2)-O(4)#3   | 86.7(2)    |
| N(2)#1-Cu(2)-O(4)#3 | 99.9(2)   | O(7)-Cu(2)-O(8)     | 172.7(2)   |
| O(7)-Cu(2)-N(2)#1   | 86.6(2)   | O(8)-Cu(2)-N(2)#1   | 95.4(2)    |
| Cu(2)-O(7)-Cu(1)    | 94.53(19) | Cu(2)-O(7)-Cu(1)#1  | 124.6(3)   |
| Cu(1)#1-O(7)-Cu(1)  | 95.06(19) |                     |            |
| <b>2</b>            |           |                     |            |
| Zn(1)-O(1)          | 2.102(6)  | Zn(1)-O(4)#2        | 2.227(5)   |
| Zn(1)-O(7)          | 2.076(6)  | Zn(1)-O(7)#1        | 2.085(6)   |
| Zn(1)-O(8)          | 2.087(6)  | Zn(1)-N(1)          | 2.146(7)   |
| Zn(2)-O(2)#1        | 2.052(6)  | Zn(2)-O(3)#3        | 2.062(6)   |

|                     |          |                     |          |
|---------------------|----------|---------------------|----------|
| Zn(2)-O(7)          | 2.022(5) | Zn(2)-O(9)          | 2.165(6) |
| Zn(2)-N(2)          | 2.071(7) |                     |          |
| O(1)-Zn(1)-O(4)#2   | 87.9(2)  | O(7)-Zn(1)-O(1)     | 174.9(2) |
| O(7)#1-Zn(1)-O(1)   | 92.8(2)  | O(8)-Zn(1)-O(1)     | 83.1(2)  |
| O(1)-Zn(1)-N(1)     | 92.1(2)  | O(7)-Zn(1)-O(4)#2   | 92.9(2)  |
| O(7)#1-Zn(1)-O(4)#2 | 83.9(2)  | O(8)-Zn(1)-O(4)#2   | 87.1(2)  |
| N(1)-Zn(1)-O(4)#2   | 173.1(2) | O(7)-Zn(1)-O(7)#1   | 82.3(2)  |
| O(7)-Zn(1)-O(8)     | 102.0(2) | O(7)-Zn(1)-N(1)     | 87.8(2)  |
| O(7)#1-Zn(1)-O(8)   | 170.3(2) | O(7)#1-Zn(1)-N(1)   | 102.9(2) |
| O(8)-Zn(1)-N(1)     | 86.1(2)  | O(2)#1-Zn(2)-O(3)#3 | 87.2(2)  |
| O(7)-Zn(2)-O(2)#1   | 94.1(2)  | O(2)#1-Zn(2)-O(9)   | 85.3(2)  |
| O(2)#1-Zn(2)-N(2)   | 164.9(3) | O(7)-Zn(2)-O(3)#3   | 99.7(2)  |
| O(3)#3-Zn(2)-O(9)   | 87.7(2)  | O(3)#3-Zn(2)-N(2)   | 105.4(2) |
| O(7)-Zn(2)-O(9)     | 172.5(2) | O(7)-Zn(2)-N(2)     | 92.0(2)  |
| N(2)-Zn(2)-O(9)     | 86.8(3)  |                     |          |

### 3

|                          |            |                     |            |
|--------------------------|------------|---------------------|------------|
| Cd(1)-O(1)               | 2.487(4)   | Cd(1)-O(2)          | 2.286(4)   |
| Cd(1)-O(3)#2             | 2.277(4)   | Cd(1)-O(4)#2        | 2.567(4)   |
| Cd(1)-O(12)#1            | 2.269(4)   | Cd(1)-N(1)          | 2.256(4)   |
| Cd(2)-O(5)#2             | 2.351(4)   | Cd(2)-O(13)         | 2.285(4)   |
| Cd(2)-O(14)              | 2.251(4)   | Cd(2)-O(15)         | 2.274(4)   |
| Cd(2)-N(2)               | 2.354(4)   | Cd(2)-N(4)          | 2.317(5)   |
| Cd(3)-O(6)#2             | 2.229(4)   | Cd(3)-O(7)          | 2.382(4)   |
| Cd(3)-O(8)               | 2.419(4)   | Cd(3)-O(10)#1       | 2.238(4)   |
| Cd(3)-O(13)              | 2.524(4)   | Cd(3)-N(5)          | 2.358(4)   |
| O(2)-Cd(1)-O(1)          | 54.22(14)  | O(3)#2-Cd(1)-O(1)   | 139.33(14) |
| O(1)-Cd(1)-O(4)#2        | 126.68(13) | O(12)#1-Cd(1)-O(1)  | 88.03(14)  |
| N(1)-Cd(1)-O(1)          | 82.70(16)  | O(3)#2-Cd(1)-O(2)   | 89.30(14)  |
| O(2)-Cd(1)-O(4)#2        | 83.07(14)  | O(12)#1-Cd(1)-O(2)  | 115.35(15) |
| N(1)-Cd(1)-O(2)          | 118.17(17) | O(3)#2-Cd(1)-O(4)#2 | 53.48(12)  |
| O(12)#1-Cd(1)-<br>O(3)#2 | 93.51(14)  | N(1)-Cd(1)-O(3)#2   | 135.66(14) |
| O(12)#1-Cd(1)-<br>O(4)#2 | 143.37(13) | N(1)-Cd(1)-O(4)#2   | 93.55(14)  |
| N(1)-Cd(1)-O(12)#1       | 103.30(16) | O(13)-Cd(2)-O(5)#2  | 80.43(15)  |
| O(14)-Cd(2)-O(5)#2       | 84.35(15)  | O(15)-Cd(2)-O(5)#2  | 161.66(16) |
| O(5)#2-Cd(2)-N(2)        | 113.92(15) | N(4)-Cd(2)-O(5)#2   | 84.49(15)  |
| O(14)-Cd(2)-O(13)        | 158.67(15) | O(15)-Cd(2)-O(13)   | 107.90(16) |
| O(13)-Cd(2)-N(2)         | 87.53(15)  | O(13)-Cd(2)-N(4)    | 80.95(15)  |
| O(14)-Cd(2)-O(15)        | 91.07(16)  | O(14)-Cd(2)-N(2)    | 85.06(16)  |
| O(14)-Cd(2)-N(4)         | 112.46(16) | O(15)-Cd(2)-N(2)    | 83.24(17)  |
| O(15)-Cd(2)-N(4)         | 80.87(17)  | N(4)-Cd(2)-N(2)     | 156.42(18) |
| O(6)#2-Cd(3)-O(7)        | 84.15(14)  | O(6)#2-Cd(3)-O(8)   | 136.77(14) |
| O(6)#2-Cd(3)-            | 117.78(15) | O(6)#2-Cd(3)-O(13)  | 110.87(14) |

|                     |            |                    |            |
|---------------------|------------|--------------------|------------|
| O(10)#1             |            |                    |            |
| O(6)#2-Cd(3)-N(5)   | 91.25(16)  | O(7)-Cd(3)-O(8)    | 54.37(13)  |
| O(10)#1-Cd(3)-O(7)  | 122.21(15) | O(7)-Cd(3)-O(13)   | 154.08(14) |
| N(5)-Cd(3)-O(7)     | 81.23(16)  | O(10)#1-Cd(3)-O(8) | 81.27(14)  |
| O(8)-Cd(3)-O(13)    | 112.11(14) | N(5)-Cd(3)-O(8)    | 93.51(15)  |
| O(10)#1-Cd(3)-O(13) | 70.51(14)  | O(10)#1-Cd(3)-N(5) | 142.61(16) |
| N(5)-Cd(3)-O(13)    | 77.57(14)  |                    |            |

Symmetry transformations used to generate equivalent atoms: #1 -x+1, -y+1, -z; #2 -x+2, y-1/2, -z+1/2; #3 -x+1, y-1/2, -z+1/2 for **1**; #1 -x+1, -y+4, -z; #2 -x+1, -y+3, -z; #3 x+1, y+1, z for **2**; #1 -x+1, -y+2, -z; #2 -x+1, -y+1, -z+1 for **3**.

**Table S2** Hydrogen bonds for **1**, **2** and **3** (Å and °).

| D-H...A                           | d(D-H)    | d(H...A)  | D(D...A)  | <(DHA)    |
|-----------------------------------|-----------|-----------|-----------|-----------|
| <b>1</b>                          |           |           |           |           |
| O(7)-H(1W)...O(6) <sup>i</sup>    | 0.89(2)   | 1.87(3)   | 2.748(7)  | 167(7)    |
| O(8)-H(2W)...O(9) <sup>i</sup>    | 0.877(19) | 1.752(19) | 2.621(9)  | 171(5)    |
| O(8)-H(3W)...O(3) <sup>ii</sup>   | 0.89(2)   | 1.72(2)   | 2.606(7)  | 171(7)    |
| O(9)-H(4W)...O(6) <sup>i</sup>    | 0.91(2)   | 1.94(4)   | 2.640(9)  | 132(4)    |
| O(9)-H(5W)...O(7)                 | 0.91(2)   | 2.42(6)   | 3.067(9)  | 128(6)    |
| <b>2</b>                          |           |           |           |           |
| O(7)-H(1W)...O(5) <sup>i</sup>    | 0.90(2)   | 2.13(6)   | 2.875(8)  | 138(7)    |
| O(8)-H(2W)...O(5) <sup>ii</sup>   | 0.91(2)   | 1.73(3)   | 2.609(8)  | 163(6)    |
| O(8)-H(3W)...O(3) <sup>i</sup>    | 0.90(2)   | 1.80(4)   | 2.627(8)  | 151(7)    |
| O(9)-H(4W)...O(8) <sup>iii</sup>  | 0.91(2)   | 2.35(7)   | 2.968(9)  | 125(6)    |
| O(9)-H(5W)...O(10) <sup>iv</sup>  | 1.019(15) | 2.520(16) | 3.538(9)  | 177(6)    |
| O(10)-H(6W)...O(8) <sup>v</sup>   | 0.90(2)   | 2.41(7)   | 3.098(10) | 133(7)    |
| O(10)-H(7W)...O(6)                | 0.90(2)   | 1.88(4)   | 2.751(10) | 161(10)   |
| O(11)-H(8W)...O(10)               | 0.90(2)   | 2.08(6)   | 2.918(12) | 154(12)   |
| O(11)-H(9W)...O(10) <sup>vi</sup> | 0.90(2)   | 2.06(5)   | 2.895(13) | 153(10)   |
| <b>3</b>                          |           |           |           |           |
| O(13)-H(1W)...O(11) <sup>i</sup>  | 0.891(19) | 1.92(3)   | 2.726(5)  | 149(5)    |
| O(13)-H(2W)...O(17)               | 0.890(19) | 1.78(3)   | 2.617(7)  | 156(6)    |
| O(14)-H(3W)...O(16) <sup>ii</sup> | 0.899(19) | 1.84(2)   | 2.706(7)  | 161(5)    |
| O(14)-H(4W)...O(4) <sup>iii</sup> | 0.886(19) | 1.98(4)   | 2.732(6)  | 142(6)    |
| O(15)-H(5W)...O(3) <sup>iv</sup>  | 0.967(17) | 2.069(19) | 2.733(6)  | 124.2(16) |
| O(15)-H(6W)...O(9) <sup>v</sup>   | 0.86(2)   | 2.05(4)   | 2.627(6)  | 123(4)    |
| O(16)-H(7W)...O(4)                | 0.89(2)   | 1.98(2)   | 2.868(6)  | 173(7)    |
| O(16)-H(8W)...O(3) <sup>iii</sup> | 0.89(2)   | 2.05(2)   | 2.921(6)  | 165(6)    |
| O(17)-H(9W)...O(8) <sup>v</sup>   | 0.89(2)   | 2.40(2)   | 2.866(7)  | 1113(2)   |
| O(17)-H(10W)...O(18)              | 0.90(2)   | 1.93(3)   | 2.785(9)  | 158(6)    |
| O(18)-H(11W)...O(10) <sup>i</sup> | 0.90(2)   | 2.03(3)   | 2.896(7)  | 162(5)    |
| O(18)-H(12W)...O(9)               | 0.89(2)   | 2.13(3)   | 3.011(7)  | 168(7)    |

Symmetry transformations used to generate equivalent atoms: i  $-x+1, y-1/2, -z+1/2$ ; ii  $-x+2, y-1/2, -z+1/2$  for **1**; i  $-x+1, -y+3, -z$ ; ii  $x+1, y+1, z$ ; iii  $x, y+1, z$ ; iv  $x+1, y+2, z$ ; v  $x-1, y-1, z$ ; vi  $-x-1, -y+1, -z-1$  for **2**; i  $-x+1, -y+2, -z$ ; ii  $x+1, y, z$ ; iii  $-x+1, -y+1, -z+1$ ; iv  $-x+2, -y+1, -z+1$ ; v  $-x+2, -y+2, -z$  for **3**.

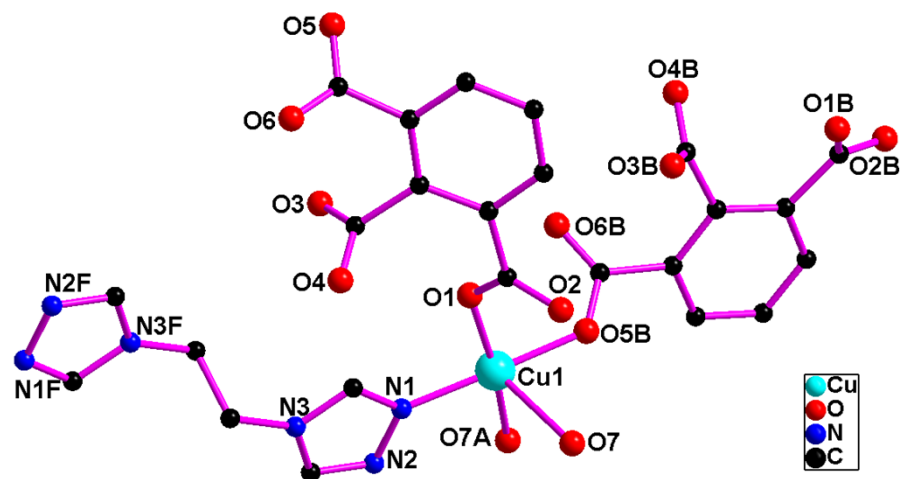

Fig. S1 The coordination environment of Cu1(II) atom in **1**.

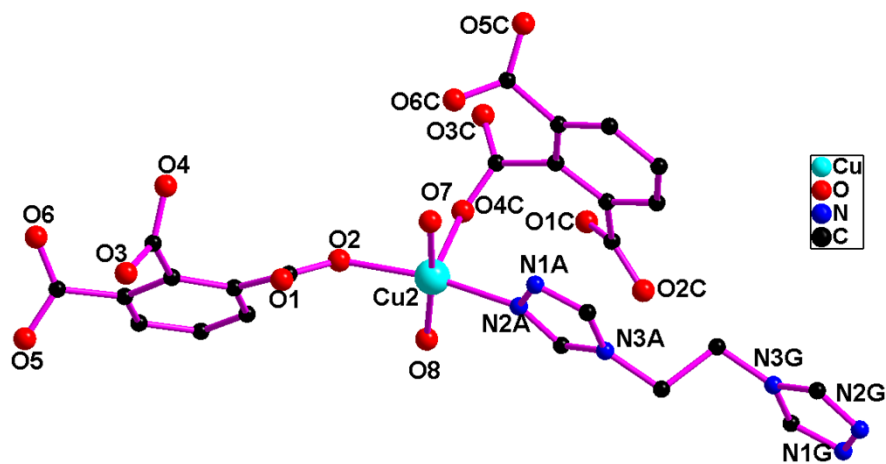

Fig. S2 The coordination environment of Cu2(II) atom in **1**.

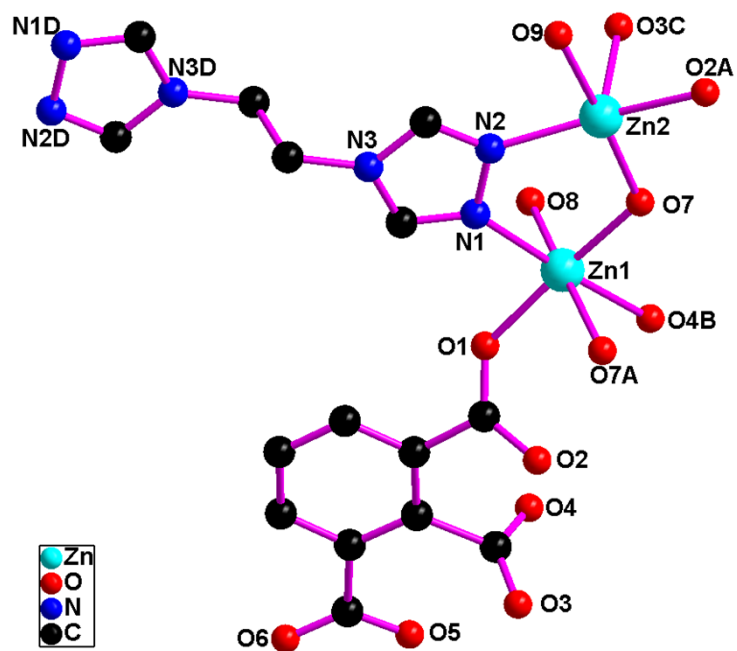

Fig. S3 The coordination environment of Zn(II) atoms in 2.

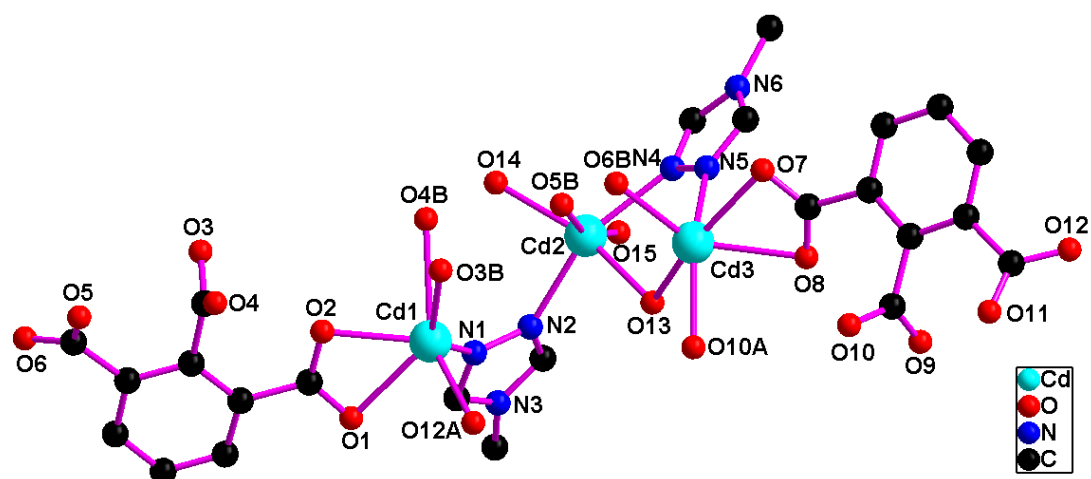

Fig. S4 The coordination environment of Cd(II) atoms in 3.

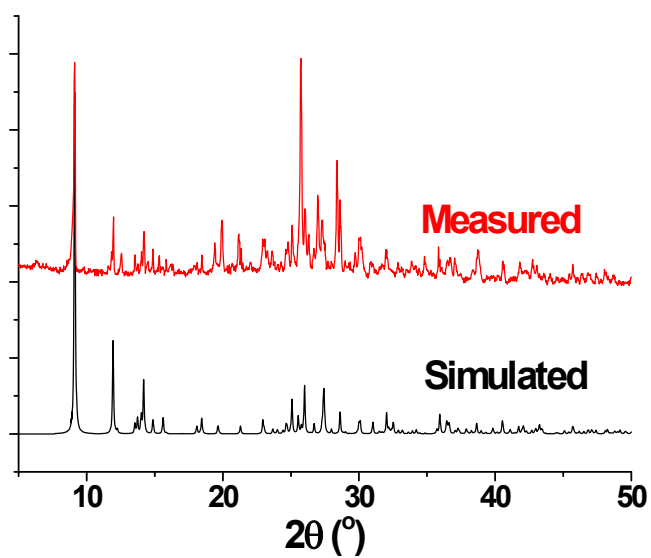

**Fig. S5** PXRD patterns of the measured and simulated diagram from single crystal data of **1**.

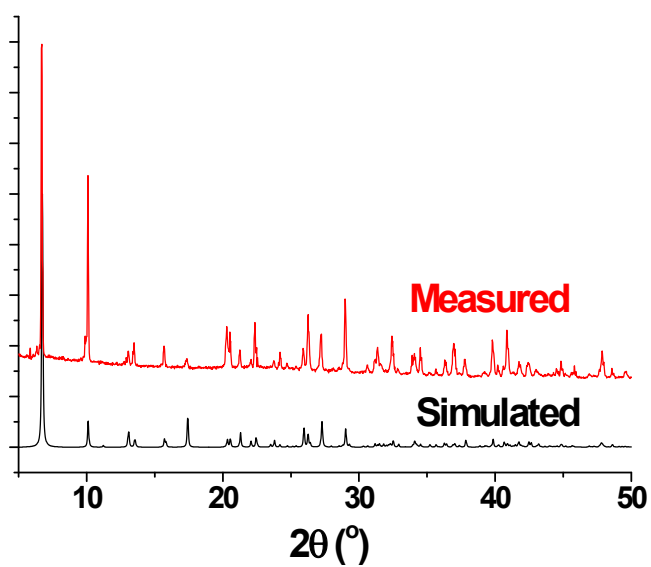

**Fig. S6** PXRD patterns of the measured and simulated diagram from single crystal data of **2**.

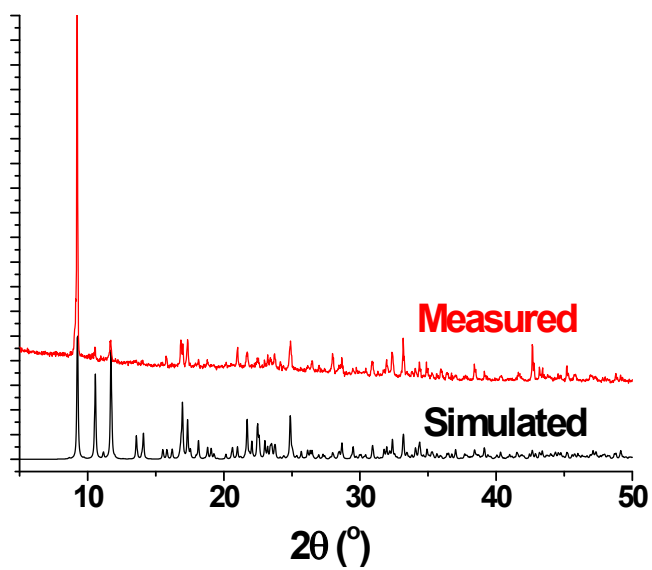

Fig. S7 PXRD patterns of the measured and simulated diagram from single crystal data of 3.

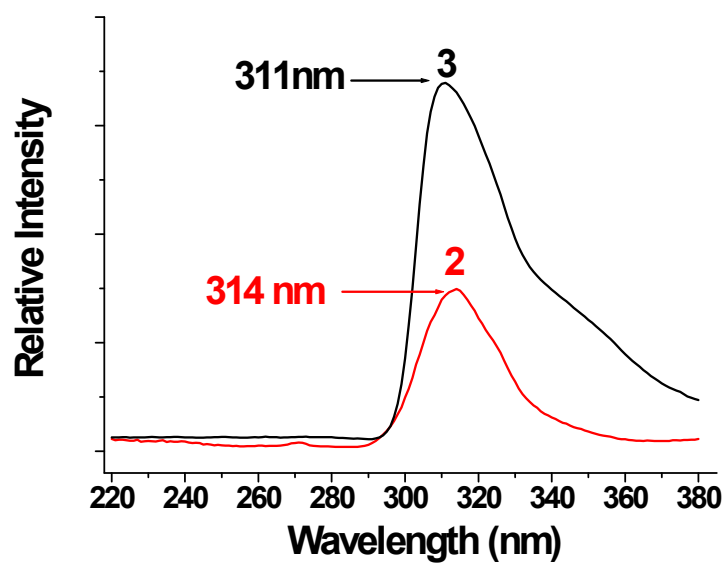

Fig. S8 The excitation spectra of 2 and 3 in the solid state at room temperature.
